# Supplementary material for: Application of a CuS/Au heterostructure with peroxidase-like activity in immunosensors
Source: Royal Society of Chemistry journal article supplement (doi:10.1039/d2nj02738k), 2022-01-01
Supplement: d2nj02738k1.pdf [file d2nj02738k1.pdf]

## Supporting Information

### Application of CuS/Au Heterostructure with peroxidase-like activity in immunosensors

Pengli Li, Min Wang, Mingzhe Jiang, Wenjing Lai, Jiajia Li, Kailin Liu, Hongling  
Li\* and Chenglin Hong\*

Key Laboratory for Green Processing of Chemical Engineering of Xinjiang Bingtuan,  
Engineering Research Center of Materials-Oriented Chemical Engineering of  
Xinjiang Production and Construction Corps, School of Chemistry and Chemical  
Engineering, Shihezi University, Shihezi 832003, PR China.

**\*Corresponding Author:** Chenglin Hong, Hongling Li

E-mail: [hcl\\_tea@shzu.edu.cn](mailto:hcl_tea@shzu.edu.cn) Phone: 86+18097586568 (CN)

E-mail: [lh1\\_tea@shzu.edu.cn](mailto:lh1_tea@shzu.edu.cn) Phone: 86+13565555922 (CN)

### 3.5 Optimization of experimental condition

Incubation temperature of antigen can influence the amount of interaction and binding during specific recognition of antigen and antibody. Therefore, the incubation temperature will affect the current signal of the immunosensor. As shown in Fig. S1(A), its response value gradually increased when the incubation time was increased from 27°C to 37°C. However, the current response value decreased significantly when the incubation temperature was further increased. This may be due to the high temperature, which caused the inactivation of proteins such as antigen antibody. Therefore, considering the maximum sensitivity of the electrochemical immunosensor, the optimal incubation temperature for determining the antigen of AFP is 37 °C.

Bovine serum protein( BSA) is essential in the electrochemical immune system to reduce nonspecific binding of proteins and produce a low background signal<sup>1</sup>. Therefore, the BSA content is particularly critical. As shown in Fig. S1 (B) , BSA levels of 1% and 0.2% showed the highest current response signal values. However, 0.2% BSA will result in less complete closure of the non-specific binding site and lead to a higher background signal. When the BSA content is greater than 1%, it can be seen that the current response gradually decreases as the BSA content gradually increases. We speculate that the increase in protein content will increase the interfacial electron transfer resistance, resulting in a decrease in its current value.

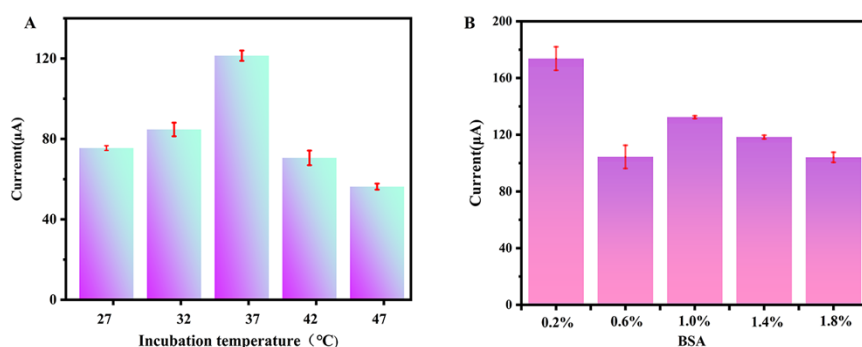

Fig. S1. (A) Optimization of antigen incubation temperature and (B)bovine serum protein mass fraction

**Table S1 Comparison of analytical performance of CEA immunosensors with different nanomaterials**

| analytical method         | Nanomaterial                        | Liner range (ng/mL) | Detection limit(ng/mL) | Ref       |
|---------------------------|-------------------------------------|---------------------|------------------------|-----------|
| photoelectrochemical      | NaYF <sub>4</sub> :Yb,Er UCNPs@CdTe | 0.1-300             | 0.032                  | 2         |
| point-of-care immunoassay | platinum nanozyme                   | 0.5-60              | 0.167                  | 3         |
| Fluorescence              | CdTe / CdSe QDs                     | 0.05-20             | 0.0067                 | 4         |
| Electrochemistry          | Graphene oxide/MoS <sub>2</sub>     | 0.5-200             | 0.01                   | 5         |
| Electrochemistry          | Fe <sub>3</sub> O <sub>4</sub>      | 0.01-80             | 0.0062                 | 6         |
| Electrochemistry          | HRP-Au                              | 0.1-200             | 0.04                   | 7         |
| Electrochemistry          | CuS-Au                              | 0.1-80              | 0.0055                 | This work |

## References

1. F. Azri, R. Sukor, J. Selamat, F. Abu Bakar, N. Yusof and R. Hajian, *Toxins*, 2018, **10**.
2. Z. Qiu, J. Shu, J. Liu and D. Tang, *Analytical Chemistry*, 2019, **91**, 1260-1268.
3. Z. Yu, Y. Tang, G. Cai, R. Ren and D. Tang, *Analytical Chemistry*, 2019, **91**, 1222-1226.
4. Z. Qiu, J. Shu and D. Tang, *Analytical Chemistry*, 2017, **89**, 5152-5160.
5. L. Qian, X. Yun, G. Ning, C. Yuting, L. Tianhua and C. Yinji, *Sensors and Actuators B: Chemical*, 2016, DOI: 10.1016/j.snb.2016.08.123.
6. L. Pengli and Z. Hongfang, *Journal of the Chinese Chemical Society*, 2016, DOI: 10.1002/jccs.201600120.
7. S. Rafique, W. Bin and A. S. Bhatti, *Bioelectrochemistry*, 2015, **101**, 75-83.
